# Supplementary material
Source: ML conference proceedings conference paper supplement (https://proceedings.neurips.cc/paper_files/paper/2020/hash/d03a857a23b5285736c4d55e0bb067c8-Abstract.html)
Supplement: Supplementary file [file d03a857a23b5285736c4d55e0bb067c8-Supplemental.pdf]

## A Proof of Prop. 1: SKSD closed form

Our proof will parallel that of Gorham and Mackey [22, Prop. 2] for non-stochastic KSDs. For each  $j \in [d]$  and each  $\sigma_i$ , we define the coordinate operators

$$\frac{L}{m}(\mathcal{T}_{\sigma_i}^j f)(x) \triangleq \left(\frac{L}{m}\nabla_{x_j} \log p_{\sigma_i}(x) + \nabla_{x_j}\right)f(x)$$

for  $f : \mathbb{R}^d \rightarrow \mathbb{R}$ . For each  $g = (g_1, \dots, g_d) \in \mathcal{G}_{k, \|\cdot\|}$  and  $x \in \mathbb{R}^d$ , our  $C^{(1,1)}$  assumption on  $k$  and the proof of [47, Cor. 4.36] imply that

$$(\mathcal{T}_{\sigma_i} g)(x) = \sum_{j=1}^d (\mathcal{T}_{\sigma_i}^j g_j)(x) = \sum_{j=1}^d \mathcal{T}_{\sigma_i}^j \langle g_j, k(x, \cdot) \rangle_{\mathcal{K}_k} = \sum_{j=1}^d \langle g_j, \mathcal{T}_{\sigma_i}^j k(x, \cdot) \rangle_{\mathcal{K}_k}.$$

Meanwhile, the result [47, Lem. 4.34] yields

$$\left\langle \frac{L}{m} \mathcal{T}_{\sigma_i}^j k(x_i, \cdot), \frac{L}{m} \mathcal{T}_{\sigma_{i'}}^j k(x_{i'}, \cdot) \right\rangle = \left(\frac{L}{m} \nabla_{x_{ij}} \log p_{\sigma_i}(x_i) + \nabla_{x_{ij}}\right) \left(\frac{L}{m} \nabla_{x_{i'j}} \log p_{\sigma_{i'}}(x_{i'}) + \nabla_{x_{i'j}}\right) k(x_i, x_{i'})$$

for all  $i, i' \in [n]$  and  $j \in [d]$ . Therefore, the advertised

$$w_j^2 = \frac{1}{n^2} \sum_{i=1}^n \sum_{i'=1}^n \left\langle \frac{L}{m} \mathcal{T}_{\sigma_i}^j k(x_i, \cdot), \frac{L}{m} \mathcal{T}_{\sigma_{i'}}^j k(x_{i'}, \cdot) \right\rangle = \left\| \frac{1}{n} \sum_{i=1}^n \frac{L}{m} \mathcal{T}_{\sigma_i}^j k(x_i, \cdot) \right\|_{\mathcal{K}_k}^2.$$

Finally, our assembled results and norm duality give

$$\begin{aligned} SS(Q_n, \mathcal{T}_P, \mathcal{G}_{k, \|\cdot\|}) &= \sup_{g \in \mathcal{G}_{k, \|\cdot\|}} \sum_{j=1}^d \frac{1}{n} \sum_{i=1}^n \frac{L}{m} (\mathcal{T}_{\sigma_i}^j g_j)(x_i) \\ &= \sup_{\|g_j\|_{\mathcal{K}_k} = v_j, \|v\|^* \leq 1} \sum_{j=1}^d \langle g_j, \frac{1}{n} \sum_{i=1}^n \frac{L}{m} \mathcal{T}_{\sigma_i}^j k(x_i, \cdot) \rangle_{\mathcal{K}_k} \\ &= \sup_{\|v\|^* \leq 1} \sum_{j=1}^d v_j \left\| \frac{1}{n} \sum_{i=1}^n \frac{L}{m} \mathcal{T}_{\sigma_i}^j k(x_i, \cdot) \right\|_{\mathcal{K}_k} \\ &= \sup_{\|v\|^* \leq 1} \sum_{j=1}^d v_j w_j = \|w\|. \end{aligned}$$

## B Proof of Theorem 2: SSDs detect convergence

We will find it useful to write

$$\begin{aligned} SS(Q_n, \mathcal{T}, \mathcal{G}) &= \sup_{g \in \mathcal{G}} \left| \frac{1}{n} \sum_{i=1}^n \frac{L}{m} \sum_{\sigma \in \binom{[L]}{m}} B_{i\sigma} (\mathcal{T}_\sigma g)(x_i) \right| \quad \text{for } B_{i\sigma} \triangleq \mathbb{I}[\sigma = \sigma_i] \quad (9) \\ &= \sup_{g \in \mathcal{G}} \left| \binom{L}{m}^{-1} \sum_{\sigma \in \binom{[L]}{m}} \mu_{n\sigma} (\mathcal{T}_\sigma g) \right| \quad \text{for } \mu_{n\sigma} \triangleq \binom{L}{m} \frac{1}{n} \sum_{i=1}^n B_{i\sigma} \delta_{x_i}. \end{aligned}$$

We will also write  $BL_{\|\cdot\|} \triangleq \{h : \mathbb{R}^d \rightarrow \mathbb{R} : \|h\|_\infty + \text{Lip}(h) \leq 1\}$  as the unit ball in the bounded Lipschitz metric, and for any  $R > 0$ ,  $B_R \triangleq \{x \in \mathbb{R}^d : \|x\|_2 \leq R\}$  as the radius  $R$  ball centered at the origin. For any set  $K$ , let  $I_K(x) = \mathbb{I}[x \in K]$ .

Our proof relies on a lemma, proved in App. B.1, that boosts almost sure convergence in distribution into almost sure uniform convergence for the expectations of all continuous functions dominated by a uniformly integrable, locally bounded  $|f_0|$  with derivatives dominated by a locally bounded  $|f_1|$ .

**Lemma 8** (Convergence of random measures). *Consider two sequences of random measures  $(\nu_n)_{n=1}^\infty$  and  $(\tilde{\nu}_n)_{n=1}^\infty$  on  $\mathbb{R}^d$ , and suppose there exists an  $R > 0$  such that  $\nu_n(hI_{B_R}) - \tilde{\nu}_n(hI_{B_R}) \xrightarrow{a.s.} 0$  for each bounded and continuous  $h$ . Then, for  $\mathcal{H} = BL_{\|\cdot\|}$ ,*

$$\sup_{h \in \mathcal{H}} |\nu_n(hI_{B_R}) - \tilde{\nu}_n(hI_{B_R})| \xrightarrow{a.s.} 0. \quad (10)$$

*Suppose, in addition, that for every  $S > 0$  there exists an  $R \geq S$  such that (10) holds. Then if  $f_0$  is almost surely uniformly  $\nu_n$ -integrable and uniformly  $\tilde{\nu}_n$ -integrable, and  $f_0, f_1$  are bounded on each compact set, we have*

$$\sup_{h \in \mathcal{H}_f} |\nu_n(h) - \tilde{\nu}_n(h)| \xrightarrow{a.s.} 0,$$

where  $\mathcal{H}_f \triangleq \{h \in C(\mathbb{R}^d) : |h(x)| \leq |f_0(x)|, \frac{|h(x) - h(y)|}{\|x - y\|_2} \leq |f_1(x)| + |f_1(y)| \text{ for all } x, y \in \mathbb{R}^d\}$ .

Since  $W_a(Q_n, P) \rightarrow 0$ , [17, Proof of Cor. 1] implies that  $Q_n(h) \rightarrow P(h)$  for all bounded continuous  $h$  and that  $f_0(x) = c(1 + \|x\|_2^a)$  is uniformly  $Q_n$ -integrable and  $P$ -integrable. Moreover, for each  $\sigma \in \binom{[L]}{m}$ ,  $\mu_{n\sigma}(h) - \frac{L}{m}Q_n(h) \xrightarrow{a.s.} 0$  for all bounded  $h$  by Lemma 10, and thus  $\mu_{n\sigma}(hI_{B_R}) - Q_n(hI_{B_R}) \xrightarrow{a.s.} 0$  for all bounded  $h \in C(\mathbb{R}^d)$  and any  $R > 0$ . Since, for any compact set  $K$ ,  $\mu_{n\sigma}(|f_0|I_{K^c}) \leq \binom{L}{m} \frac{L}{m} Q_n(|f_0|I_{K^c})$ ,  $f_0$  is also uniformly  $\mu_{n\sigma}$ -integrable. By assumption  $f_1(x) = \omega(\|x\|_2)$  for  $\omega(R) \triangleq \sup_n \sup_{g \in \mathcal{G}_n, x, y \in B_{2R}} \frac{|(\mathcal{T}_\sigma g)(x) - (\mathcal{T}_\sigma g)(y)|}{\|x - y\|_2}$  is bounded on any compact set.

Moreover, since  $P$  is a finite measure, there are at most countably many values  $R$  for which  $P(\{x : \|x\|_2 = R\}) > 0$ . Hence, for any  $S > 0$  we can choose  $R \geq S$  such that  $B_R$  is a continuity set under  $P$ . For any such  $R$ ,  $Q_n(hI_{B_R}) - P(hI_{B_R}) \rightarrow 0$  for any bounded  $h \in C(\mathbb{R}^d)$  by the Portmanteau theorem [29, Thm. 13.16], since  $W_a(Q_n, P) \rightarrow 0$  implies convergence in distribution.

Finally, the assumption  $P(\mathcal{T}g) = 0$  for all  $g \in \mathcal{G}_n$ , the triangle inequality, the continuity and polynomial growth of each function in  $\mathcal{T}_\sigma \mathcal{G}_n$ , and Lemma 8 applied first to  $\mu_{n\sigma}$  and  $(Q_n)_{n=1}^\infty$  for each  $\sigma$  and then to  $(Q_n)_{n=1}^\infty$  and  $P$  together yield

$$\begin{aligned} \mathcal{SS}(Q_n, \mathcal{T}, \mathcal{G}_n) &= \sup_{g \in \mathcal{G}_n} \left| \binom{L}{m}^{-1} \sum_{\sigma \in \binom{[L]}{m}} \mu_{n\sigma}(\mathcal{T}_\sigma g) - \frac{L}{m} Q_n(\mathcal{T}_\sigma g) + \frac{L}{m} Q_n(\mathcal{T}_\sigma g) - \frac{L}{m} P(\mathcal{T}_\sigma g) \right| \\ &\leq \binom{L}{m}^{-1} \sum_{\sigma \in \binom{[L]}{m}} \sup_{h \in \mathcal{H}_f} |\mu_{n\sigma}(h) - \frac{L}{m} Q_n(h)| + \frac{L}{m} |Q_n(h) - P(h)| \xrightarrow{a.s.} 0. \end{aligned}$$

### B.1 Proof of Lemma 8: Convergence of random measures

Fix any  $R, \epsilon > 0$  and let  $K = B_R$ . By the Arzelà–Ascoli theorem [15, Thm. 8.10.6], there exists a finite  $\epsilon/2$ -subcover of the set of  $K$ -restrictions  $\{h|_K : h \in \mathcal{H}\}$ . Since any bounded continuous function on  $K$  can be extended to a bounded continuous function on  $\mathbb{R}^d$ , there therefore exists a sequence of bounded continuous functions  $(h_k)_{k=1}^m$  on  $\mathbb{R}^d$  such that

$$\begin{aligned} \mathbb{P}(\sup_{h \in \mathcal{H}} |\nu_n(hI_K) - \tilde{\nu}_n(hI_K)| > \epsilon \text{ i.o.}) &\leq \mathbb{P}(\max_{1 \leq k \leq m} |\nu_n(h_k I_K) - \tilde{\nu}_n(h_k I_K)| > \epsilon/2 \text{ i.o.}) \\ &\leq \sum_{k=1}^m \mathbb{P}(|\nu_n(h_k) - \tilde{\nu}_n(h_k)| > \epsilon/2 \text{ i.o.}) = 0, \end{aligned}$$

where we have used the union bound and our almost sure convergence assumption for bounded continuous functions. The first result (10) now follows since  $\epsilon$  was arbitrary.

We next assume that the event  $\mathcal{E}$  on which  $f_0$  is uniformly  $\nu_n$  and  $\tilde{\nu}_n$ -integrable occurs with probability 1, and fix any  $\epsilon > 0$ . On  $\mathcal{E}$  there exists  $R_\epsilon > 0$  such that (10) holds and  $\sup_n \max(\nu_n(|f_0|I_{K_\epsilon^c}), \tilde{\nu}_n(|f_0|I_{K_\epsilon^c})) \leq \epsilon/2$  for  $K_\epsilon \triangleq B_{R_\epsilon}$ . Furthermore, on  $\mathcal{E}$ ,

$$\begin{aligned} \sup_{h \in \mathcal{H}_f} |\nu_n(h) - \nu_n(hI_{K_\epsilon})| + |\tilde{\nu}_n(h) - \tilde{\nu}_n(hI_{K_\epsilon})| &\leq \sup_{h \in \mathcal{H}_f} \nu_n(|h|I_{K_\epsilon^c}) + \tilde{\nu}_n(|h|I_{K_\epsilon^c}) \\ &\leq \nu_n(|f_0|I_{K_\epsilon^c}) + \tilde{\nu}_n(|f_0|I_{K_\epsilon^c}) \leq \epsilon. \end{aligned}$$

Therefore, the triangle inequality, fact that for each  $R > 0$  there is a constant  $c_R > 0$  such that  $\{hI_{B_R} : h \in \mathcal{H}_f\} \subseteq \{c_R hI_{B_R} : h \in \mathcal{H}\}$ , and our first result (10) give

$$\begin{aligned} \mathbb{P}(\sup_{h \in \mathcal{H}_f} |\nu_n(h) - \tilde{\nu}_n(h)| > 2\epsilon \text{ i.o.}) &\leq \mathbb{P}(\mathcal{E}^c) + \mathbb{P}(\sup_{h \in \mathcal{H}_f} |\nu_n(hI_{K_\epsilon}) - \tilde{\nu}_n(hI_{K_\epsilon})| > \epsilon \text{ i.o.}) \\ &\leq \mathbb{P}(\mathcal{E}^c) + \mathbb{P}(c_{R_\epsilon} \sup_{h \in \mathcal{H}} |\nu_n(hI_{K_\epsilon}) - \tilde{\nu}_n(hI_{K_\epsilon})| > \epsilon \text{ i.o.}) \\ &= 0. \end{aligned}$$

The second result now follows since  $\epsilon$  was arbitrary.

## C Proof of Theorem 3: Bounded SDs detect tight non-convergence

We consider each Stein set candidate in turn.

### C.1 Kernel Stein set

Suppose  $\mathcal{G}_n$  satisfies (A.1). Since, for any vector norm  $\|\cdot\|$  on  $\mathbb{R}^d$ , there exists  $c_d$  such that  $\{g \in \mathcal{G}_{k, \|\cdot\|} : \max_{\sigma \in \binom{[L]}{m}} \|\mathcal{T}_\sigma g\|_\infty \leq 1\} \subseteq c_d \{g \in \mathcal{G}_{k, \|\cdot\|} : \max_{\sigma \in \binom{[L]}{m}} \|\mathcal{T}_\sigma g\|_\infty \leq 1\}$  [4], it suffices to assume  $\|\cdot\| = \|\cdot\|_2$ .

**Choosing a convergence-determining IPM  $d_{\mathcal{H}}$**  Consider the test function set  $\mathcal{H}$  from [22, Sec E.1, Proof of Thm. 5] which satisfies

1.  $\|h\|_{\infty} \leq 1$  and  $\text{Lip}(h) \leq 1 + \sqrt{d-1}$  for all  $h \in \mathcal{H}$  and
2.  $Q_n \not\rightarrow P$  implies  $d_{\mathcal{H}}(Q_n, P) \not\rightarrow 0$  for any sequence of probability measures  $(Q_n)_{n \geq 1}$ .

**Solving the Stein equation  $\mathcal{T}_P g_h = h - P(h)$**  Let us define  $\Xi(x) \triangleq (1 + \|x\|_2^2)^{1/2}$ . By [22, Sec E.1, Proof of Thm. 5], for each  $h \in \mathcal{H}$  there exists an accompanying function  $g_h$  such that  $\mathcal{T}_P g_h = h - P(h)$  and  $\|\Xi g_h\|_{\infty} \leq \mathcal{M}_P$  for a constant  $\mathcal{M}_P > 0$  independent of  $h$ .

**Smoothing the Stein function  $g_h$**  Fix any  $\rho \in (0, 1]$ , and let  $U \sim \mathcal{N}(0, I)$ . Since  $\nabla \log p$  is Lipschitz, the argument in [22, Proof of Thm. 13] constructs a smoothed approximation  $g_{h,\rho}(x) = \mathbb{E}[g_h(x - \rho U)]$  satisfying

$$\|\mathcal{T}_P g_{h,\rho} - \mathcal{T}_P g_h\|_{\infty} \leq C_1 \rho \quad (11)$$

for a constant  $C_1$  independent of  $h$  and  $\rho$ . Moreover, the following lemma shows that

$$\|\Xi g_{h,\rho}\|_{\infty} \leq \|\Xi g_h\|_{\infty} \sqrt{2} \mathbb{E}[1 + \|U\|_2] \leq \mathcal{M}'_P \triangleq \sqrt{2} \mathcal{M}_P (1 + \sqrt{d}),$$

where  $\mathcal{M}_P$  is notably independent of  $\rho$  and  $h$ .

**Lemma 9** (Smoothing preserves decay). *For each  $g : \mathbb{R}^d \rightarrow \mathbb{R}^d$ ,  $\epsilon \in [0, 1]$ , and absolutely integrable random vector  $Y \in \mathbb{R}^d$ ,*

$$\sup_{x \in \mathbb{R}^d} \mathbb{E}[A(x) \|g(x - \epsilon Y)\|_2] \leq \sqrt{2} \|\Xi g\|_{\infty} \mathbb{E}[A(Y)] \quad \text{for } A(x) \triangleq 1 + \|x\|_2. \quad (12)$$

**Proof** For  $B(y) \triangleq \sup_{x,u \in (0,1]} A(x) / \Xi(x - uy)$ , we have

$$\begin{aligned} \sup_{x \in \mathbb{R}^d} \mathbb{E}[(1 + \|x\|_2) \|g(x - \epsilon Y)\|_2] &= \sup_{x \in \mathbb{R}^d} \mathbb{E}\left[\frac{(1 + \|x\|_2)}{\Xi(x - \epsilon Y)} \Xi(x - \epsilon Y) \|g(x - \epsilon Y)\|_2\right] \\ &\leq \sup_{x \in \mathbb{R}^d} \|\Xi g\|_{\infty} \mathbb{E}\left[\frac{(1 + \|x\|_2)}{\Xi(x - \epsilon Y)}\right] \leq \|\Xi g\|_{\infty} \mathbb{E}[B(Y)]. \end{aligned}$$

Moreover,  $\Xi(z) \geq 2^{-1/2}(1 + \|z\|_2)$  for all  $z$  implies that, for any  $y$ ,

$$\begin{aligned} B(y) = \sup_{x,u \in (0,1]} \frac{A(x)}{\Xi(x - uy)} &\leq \sup_{x,u \in (0,1]} \sqrt{2} \frac{A(x)}{1 + \|x - uy\|_2} = \sup_{z,u \in (0,1]} \sqrt{2} \frac{A(z + uy)}{1 + \|z\|_2} \\ &\leq \sup_{z,u \in (0,1]} \sqrt{2} \frac{A(z) + u \|y\|_2}{1 + \|z\|_2} \leq \sqrt{2} A(y), \end{aligned}$$

where we used the triangle inequality in the penultimate inequality.  $\square$

**Truncating the smoothed Stein function  $g_{h,\rho}$**  Fix any  $\epsilon \in (0, 1)$ , and, since  $(Q_n)_{n=1}^{\infty}$  is tight, select a compact set  $K_{\epsilon}$  satisfying  $\sup_n Q_n(K_{\epsilon}^c) \leq \epsilon$ . The argument in [22, Proof of Thm. 13] identifies a truncation  $g_{h,\rho,\epsilon}$  and a constant  $C_0$  independent of  $h$ ,  $\epsilon$ , and  $\rho \in (0, 1]$  such that, for all  $x \in \mathbb{R}^d$ ,

$$\begin{aligned} \|g_{h,\rho,\epsilon}(x)\|_2 &\leq \|g_{h,\rho}(x)\|_2 \quad \text{and} \\ |(\mathcal{T}_P g_{h,\rho,\epsilon})(x) - (\mathcal{T}_P g_{h,\rho})(x)| &\leq C_0 \mathbb{I}[x \in K_{\epsilon}^c]. \end{aligned} \quad (13)$$

Hence,  $\|\Xi g_{h,\rho,\epsilon}\|_{\infty} \leq \|\Xi g_{h,\rho}\|_{\infty} \leq \mathcal{M}'_P$ .

**Smoothing the truncation  $g_{h,\rho,\epsilon}$**  By assumption, for all  $\sigma \in \binom{[L]}{m}$ , there is a constant  $\beta > 0$  such that  $\|\nabla \log p_{\sigma}(x)\|_2 \leq \beta(1 + \|x\|_2)$  for all  $x$ . Defining  $A_{\beta}(x) \triangleq \frac{L}{m} \beta(1 + \|x\|_2)$ , we note that, since  $\nabla \log p = \frac{L}{m} \binom{L}{m}^{-1} \sum_{\sigma \in \binom{[L]}{m}} \nabla \log p_{\sigma}$ , an application of the triangle inequality yields  $\|\nabla \log p(x)\|_2 \leq A_{\beta}(x)$  for all  $x$ . Moreover, since  $L/m \geq 1$  we have  $\|\nabla \log p_{\sigma}(x)\|_2 \leq A_{\beta}(x)$  for all  $x$  and  $\sigma$ .

From the construction in [22, Proof of Lem. 12], there is a random variable  $Y$  with finite first moment such that the function  $\tilde{g}_{h,\rho,\epsilon}(x) \triangleq \mathbb{E}[g_{h,\rho,\epsilon}(x - \epsilon Y)]$  satisfies

$$\|\mathcal{T}_P \tilde{g}_{h,\rho,\epsilon} - \mathcal{T}_P g_{h,\rho,\epsilon}\|_{\infty} \leq C_{\rho} \epsilon \quad (14)$$

and  $\tilde{g}_{h,\rho,\epsilon} \in C_{\epsilon,\rho} \mathcal{G}_n$  for constants  $C_{\rho}$  independent of  $\epsilon$  and  $h$  and  $C_{\epsilon,\rho}$  independent of  $h$ .

**Showing the smoothed truncation  $\tilde{g}_{h,\rho,\epsilon}$  is in a scaled copy of  $\mathcal{G}_{b,n}$**  By Lemma 9, we have

$$\|A_\beta \tilde{g}_{h,\rho,\epsilon}\|_\infty \leq \|\Xi g_{h,\rho,\epsilon}\|_\infty \sqrt{2\mathbb{E}[A_\beta(Y)]} \leq \widetilde{\mathcal{M}}_P \triangleq \mathcal{M}'_P \sqrt{2\mathbb{E}[A_\beta(Y)]},$$

where  $\widetilde{\mathcal{M}}_P$  is independent of  $h, \epsilon$ , and  $\rho$ . Thus for any  $\sigma$ , Cauchy-Schwarz, our bound (12), the triangle inequality, and the fact that  $\|\nabla \log p_\sigma / A_\beta\|_\infty \leq 1$  and  $\|\nabla \log p / A_\beta\|_\infty \leq 1$  imply

$$\begin{aligned} \|\frac{L}{m} \mathcal{T}_\sigma \tilde{g}_{h,\rho,\epsilon} - \mathcal{T}_P \tilde{g}_{h,\rho,\epsilon}\|_\infty &= \|\langle \frac{L}{m} \nabla \log p_\sigma - \nabla \log p, \tilde{g}_{h,\rho,\epsilon} \rangle\|_\infty \\ &\leq \|(\frac{L}{m} \nabla \log p_\sigma - \nabla \log p) / A_\beta\|_\infty \|A_\beta \tilde{g}_{h,\rho,\epsilon}\|_\infty \\ &\leq \widetilde{\mathcal{M}}_P (\frac{L}{m} \|\nabla \log p_\sigma / A_\beta\|_\infty + \|\nabla \log p / A_\beta\|_\infty) \leq (\frac{L}{m} + 1) \widetilde{\mathcal{M}}_P. \end{aligned}$$

Thus, the triangle inequality and our error bounds (11), (13) and (14) yield

$$\begin{aligned} \|\mathcal{T}_P \tilde{g}_{h,\rho,\epsilon}\|_\infty &\leq \|\mathcal{T}_P g_h - \mathcal{T}_P g_{h,\rho}\|_\infty + \|\mathcal{T}_P g_{h,\rho} - \mathcal{T}_P g_{h,\rho,\epsilon}\|_\infty + \|\mathcal{T}_P g_{h,\rho,\epsilon} - \mathcal{T}_P \tilde{g}_{h,\rho,\epsilon}\|_\infty + \|\mathcal{T}_P g_h\|_\infty \\ &\leq C_1 \rho + C_0 + C_\rho \epsilon + 2 \quad \text{and} \\ \|\mathcal{T}_\sigma \tilde{g}_{h,\rho,\epsilon}\|_\infty &\leq \|\mathcal{T}_\sigma \tilde{g}_{h,\rho,\epsilon} - \frac{m}{L} \mathcal{T}_P \tilde{g}_{h,\rho,\epsilon}\|_\infty + \frac{m}{L} \|\mathcal{T}_P \tilde{g}_{h,\rho,\epsilon}\|_\infty \\ &\leq \tilde{C}_{\epsilon,\rho} \triangleq (1 + \frac{m}{L}) \widetilde{\mathcal{M}}_P + \frac{m}{L} (C_1 \rho + C_0 + C_\rho \epsilon + 2) \end{aligned}$$

for each  $\sigma$ . Therefore,  $\tilde{g}_{h,\rho,\epsilon} \in \max(C_{\epsilon,\rho}, \tilde{C}_{\epsilon,\rho}) \mathcal{G}_{b,n}$ .

**Upper bounding the IPM  $d_{\mathcal{H}}$**  Finally, we combine the triangle inequality and our approximation bounds (11), (13) and (14) once more to conclude

$$\begin{aligned} d_{\mathcal{H}}(Q_n, P) &\triangleq \sup_{h \in \mathcal{H}} |Q_n(h) - P(h)| = \sup_{h \in \mathcal{H}} |Q_n(\mathcal{T}_P g_h)| \\ &\leq \sup_{h \in \mathcal{H}} |Q_n(\mathcal{T}_P \tilde{g}_{h,\rho,\epsilon})| + |Q_n(\mathcal{T}_P \tilde{g}_{h,\rho,\epsilon} - \mathcal{T}_P g_{h,\rho,\epsilon})| + |Q_n(\mathcal{T}_P g_{h,\rho,\epsilon} - \mathcal{T}_P g_h)| + |Q_n(\mathcal{T}_P g_h - \mathcal{T}_P g_{h,\rho})| \\ &\leq \sup_{h \in \mathcal{H}} |Q_n(\mathcal{T}_P \tilde{g}_{h,\rho,\epsilon})| + C_\rho \epsilon + C_0 Q_n(K_\epsilon^c) + C_1 \rho \\ &\leq \max(C_{\epsilon,\rho}, \tilde{C}_{\epsilon,\rho}) \mathcal{S}(Q_n, \mathcal{T}_P, \mathcal{G}_{b,n}) + (C_0 + C_\rho) \epsilon + C_1 \rho. \end{aligned}$$

Since  $\epsilon$  and  $\rho$  were arbitrary, whenever  $\mathcal{S}(Q_n, \mathcal{T}_P, \mathcal{G}_{b,n}) \rightarrow 0$ , we have  $d_{\mathcal{H}}(Q_n, P) \rightarrow 0$  and hence  $Q_n \Rightarrow P$ .

## C.2 Classical Stein set

Suppose  $\mathcal{G}_n$  satisfies (A.2), and consider  $\mathcal{G}_{k,\|\cdot\|_2}$  for  $k(x, y) = \Phi(x - y) \triangleq (1 + \|\Gamma(x - y)\|_2^2)^\beta$  with  $\beta < 0$  and  $\Gamma \succ 0$ . Since  $\nabla^s \Phi(0)$  is bounded for  $s \in \{0, 2, 4\}$ , [47, Cor. 4.36] implies that  $\mathcal{G}_{k,\|\cdot\|_2} \subseteq c_0 \mathcal{G}_n$  for some  $c_0$ . The result now follows since  $\mathcal{G}_{k,\|\cdot\|_2}$  also satisfies (A.1).

## C.3 Graph Stein set

If  $\mathcal{G}_n$  satisfies (A.3), the result follows as  $\mathcal{G}_n$  contains the classical Stein set  $\mathcal{G}_{\|\cdot\|}$ .

## D Proof of Theorem 4: SSDs detect bounded SD non-convergence

Since  $\mathcal{S}(Q_n, \mathcal{T}, \mathcal{G}_{b,n}) \not\rightarrow 0$ , there exists  $\epsilon > 0$  such that  $\mathcal{S}(Q_n, \mathcal{T}, \mathcal{G}_{b,n}) > \epsilon$  infinitely often (i.o.). Fix any such  $\epsilon$ . For each  $n$ , choose  $h_n = \mathcal{T}_P g_n$  for  $g_n \in \mathcal{G}_{b,n}$  satisfying  $Q_n(h_n) \geq \mathcal{S}(Q_n, \mathcal{T}, \mathcal{G}_{b,n}) - \epsilon/2$ .

Then since  $\mathcal{T} = \binom{L}{m}^{-1} \frac{L}{m} \sum_{\sigma \in \binom{[L]}{m}} \mathcal{T}_\sigma$ ,

$$\begin{aligned} \mathcal{S}(Q_n, \mathcal{T}, \mathcal{G}_{b,n}) - \epsilon/2 &\leq Q_n(h_n) - \binom{L}{m}^{-1} \sum_{\sigma \in \binom{[L]}{m}} \mu_{n\sigma}(\mathcal{T}_\sigma g_n) + \binom{L}{m}^{-1} \sum_{\sigma \in \binom{[L]}{m}} \mu_{n\sigma}(\mathcal{T}_\sigma g_n) \\ &\leq \binom{L}{m}^{-1} \sum_{\sigma \in \binom{[L]}{m}} (\frac{L}{m} Q_n(\mathcal{T}_\sigma g_n) - \mu_{n\sigma}(\mathcal{T}_\sigma g_n)) + \mathcal{SS}(Q_n, \mathcal{T}, \mathcal{G}). \end{aligned}$$

Moreover, since  $\|\mathcal{T}_\sigma g_n\|_\infty \leq 1$  for all  $\sigma \in \binom{[L]}{m}$  and  $n$ , Lemma 10, proved in App. D.1, implies that  $\frac{L}{m} Q_n(\mathcal{T}_\sigma g_n) - \mu_{n\sigma}(\mathcal{T}_\sigma g_n) \xrightarrow{a.s.} 0$  for each  $\sigma$ .

**Lemma 10** (Bounded function convergence). *Fix any triangular array of points  $(x_i^n)_{i \in [n], n \geq 1}$  in  $\mathbb{R}^d$ , and, for each  $n \geq 1$ , define the measures*

$$\nu_n = \frac{1}{n} \sum_{i=1}^n \delta_{x_i^n} \quad \text{and} \quad \tilde{\nu}_n = \frac{1}{n} \sum_{i=1}^n \frac{B_i}{\tau} \delta_{x_i^n}$$

where  $B_i \stackrel{i.i.d.}{\sim} \text{Ber}(\tau)$  are independent Bernoulli random variables with  $\mathbb{P}(B_i = 1) = \tau$ . If  $\|h_n\|_\infty \leq 1$  for each  $n$ , then, with probability 1,

$$|\tilde{\nu}_n(h_n) - \nu_n(h_n)| \leq \tau^{-1} \sqrt{\frac{\log(n) + 2 \log(\log(n))}{2n}}$$

for all  $n$  sufficiently large. Hence,  $\tilde{\nu}_n(h_n) - \nu_n(h_n) \xrightarrow{a.s.} 0$ .

Hence

$$\begin{aligned} \mathbb{P}(\mathcal{SS}(Q_n, \mathcal{T}, \mathcal{G}_n) \not\rightarrow 0) &\geq \mathbb{P}(\mathcal{SS}(Q_n, \mathcal{T}, \mathcal{G}_n) > \epsilon/2 \text{ i.o.}) \\ &\geq \mathbb{P}(Q_n(\mathcal{T}_\sigma g_n) - \mu_{n\sigma}(\mathcal{T}_\sigma g_n) < \frac{\epsilon}{2} \text{ eventually}, \forall \sigma) = 1 \end{aligned}$$

as advertised.

### D.1 Proof of Lemma 10: Bounded function convergence

The result will follow from the following lemma which establishes rates of convergence for subsampled measure expectations to their non-subsampled counterparts.

**Lemma 11.** *Under the notation of Lemma 10, for any  $a \in [1, 2]$ ,  $\delta \in (0, 1)$ , and  $h : \mathbb{R}^d \rightarrow \mathbb{R}$ ,*

$$\begin{aligned} \tilde{\nu}_n(h) - \nu_n(h) &\leq \frac{\tau^{-1} \sqrt{\frac{1}{2} \log(1/\delta)}}{n^{1-1/a}} (\nu_n(|h|^a))^{1/a} \quad \text{with probability at least } 1 - \delta \quad \text{and} \\ \nu_n(h) - \tilde{\nu}_n(h) &\leq \frac{\tau^{-1} \sqrt{\frac{1}{2} \log(1/\delta)}}{n^{1-1/a}} (\nu_n(|h|^a))^{1/a} \quad \text{with probability at least } 1 - \delta. \end{aligned}$$

**Proof** Fix any  $a \in [1, 2]$ ,  $\delta \in (0, 1)$ , and  $h : \mathbb{R}^d \rightarrow \mathbb{R}$ . Since

$$\tilde{\nu}_n(h) = \frac{1}{n} \sum_{i=1}^n \frac{B_i}{\tau} h(x_i^n)$$

is an average of independent variables  $\tau^{-1} B_i h(x_i^n) \in \{0, \tau^{-1} h(x_i^n)\}$  with  $\mathbb{E}[\tilde{\nu}_n(h)] = \nu_n(h)$ , Hoeffding's inequality [26, Thm. 2] implies

$$\begin{aligned} \tilde{\nu}_n(h) - \nu_n(h) &\leq \tau^{-1} \sqrt{\log(1/\delta) \frac{1}{2n^2} \sum_{i=1}^n h(x_i^n)^2} \quad \text{with probability at least } 1 - \delta \quad \text{and} \\ \nu_n(h) - \tilde{\nu}_n(h) &\leq \tau^{-1} \sqrt{\log(1/\delta) \frac{1}{2n^2} \sum_{i=1}^n h(x_i^n)^2} \quad \text{with probability at least } 1 - \delta. \end{aligned}$$

Moreover, since  $\|\cdot\|_2 \leq \|\cdot\|_a$ , we have  $\sqrt{\sum_{i=1}^n h(x_i^n)^2/n^2} \leq (\sum_{i=1}^n |h(x_i^n)|^a/n^a)^{1/a}$ , and the advertised result follows.  $\square$

By Lemma 11 with  $a = 2$ ,

$$\sum_{n=1}^{\infty} \mathbb{P}(|\nu_n(h_n) - \tilde{\nu}_n(h_n)| \geq \tau^{-1} \sqrt{\frac{\log(1/\delta_n)}{2n}}) \leq \sum_{n=1}^{\infty} \delta_n < \infty$$

for  $\delta_n = 1/(n \log^2(n))$ . The result now follows from the Borel-Cantelli lemma.

### E Proof of Prop. 5: Coercive SSDs enforce tightness

Let  $f(x) = \min_{\sigma \in \binom{[L]}{m}} \frac{L}{m} (\mathcal{T}_\sigma g)(x)$ . Since  $f$  is bounded below,  $C = \inf_{x \in \mathbb{R}^d} f(x)$  is finite. Define

$$\gamma(r) \triangleq \inf\{f(x) - C : \|x\|_2 \geq r\},$$

so that  $\gamma$  is nonnegative, coercive, and non-decreasing, as  $f$  is coercive. Since  $(Q_n)_{n=1}^{\infty}$  is not tight, there exist  $\epsilon > 0$  and  $R > 0$  such that  $\limsup_n Q_n(\|X\|_2 > R) \geq \epsilon$  and  $\gamma(R)\epsilon + C > 0$ . Moreover, since  $\gamma$  is non-decreasing and nonnegative, Markov's inequality gives

$$Q_n(\|X\|_2 > R) \leq Q_n(\gamma(\|X\|_2) > \gamma(R)) \leq \mathbb{E}_{Q_n}[\gamma(\|X\|_2)]/\gamma(R) \leq (Q_n(f) - C)/\gamma(R).$$

Meanwhile, our assumption on  $g$  and the SSD subset representation (4) imply that, surely,

$$Q_n(f) = \frac{1}{n} \sum_{i=1}^n f(x_i) \leq \frac{1}{n} \sum_{i=1}^n \frac{L}{m} (\mathcal{T}_{\sigma_i} g)(x_i) \leq \mathcal{SS}(Q_n, \mathcal{T}, \mathcal{G}_n).$$

Hence,  $\mathcal{SS}(Q_n, \mathcal{T}, \mathcal{G}_n)$  surely does not converge to zero, as

$$\limsup_n \mathcal{SS}(Q_n, \mathcal{T}, \mathcal{G}_n) \geq \gamma(R) \limsup_n Q_n(\|X\|_2 > R) + C \geq \gamma(R)\epsilon + C > 0.$$

## F Proof of Theorem 6: Coercive SSDs detect non-convergence

We consider each Stein set candidate in turn.

**Kernel Stein set** Suppose  $\mathcal{G}_n$  satisfies (A.1) for one of the specified kernels,  $k_1(x, y) = \Phi_1(x - y)$  or  $k_2(x, y) = \Phi_2(x - y)$ , with  $\Gamma = I_d$ .

We have  $\hat{\Phi}_1$  and  $\hat{\Phi}_2$  are non-vanishing by [51, Thm. 8.15] and [9, Lem. 7], respectively. Moreover, we have for all  $x, y \in \mathbb{R}^d$

$$\begin{aligned} \langle \nabla \log p(x) - \nabla \log p(y), x - y \rangle &= \frac{L}{m} \binom{L}{m}^{-1} \sum_{\sigma} \langle \nabla \log p_{\sigma}(x) - \nabla \log p_{\sigma}(y), x - y \rangle \\ &\leq -\kappa \|x - y\|_2^2 + r. \end{aligned}$$

Hence if  $Q_n \not\approx P$ , then, by Theorem 3, either  $\mathcal{S}(Q_n, \mathcal{T}_P, \mathcal{G}_{b,n}) \not\rightarrow 0$  or  $(Q_n)_{n=1}^{\infty}$  is not tight.

If  $\mathcal{S}(Q_n, \mathcal{T}_P, \mathcal{G}_{b,n}) \not\rightarrow 0$ , then, with probability 1,  $\mathcal{SS}(Q_n, \mathcal{T}_P, \mathcal{G}_n) \not\rightarrow 0$  by Theorem 4.

Now suppose  $(Q_n)_{n=1}^{\infty}$  is not tight, and fix any  $\sigma \in \binom{[L]}{m}$ . Consider first the kernel  $k_1$ . Since  $\frac{L}{m} \nabla \log p_{\sigma}$  has at most linear growth and satisfies distant dissipativity, the proof of [22, Lem. 16] constructs a function  $g \in \mathcal{G}_n$  that is independent of the choice of  $\sigma$  and satisfies  $\frac{L}{m} \mathcal{T}_{\sigma} g \geq f_{\sigma}$  for some coercive bounded-below  $f_{\sigma}$ . Similarly, the same conclusion holds for the kernel  $k_2$  by the proof of [9, Thm. 3]. Since  $\binom{[L]}{m}$  has finite cardinality, we have  $\frac{L}{m} \mathcal{T}_{\sigma} g \geq f$  for a common coercive bounded-below function  $f(x) \triangleq \min_{\sigma} f_{\sigma}(x)$ . Therefore, surely,  $\mathcal{SS}(Q_n, \mathcal{T}_P, \mathcal{G}_n) \not\rightarrow 0$  by Prop. 5.

To extend this result to any  $\Gamma \succ 0$ , fix some  $\Gamma \succ 0$ . For any distribution  $P$  on  $\mathbb{R}^d$ , let us write  $\Gamma^{-1}P$  to represent the distribution of  $\Gamma^{-1}Z$  when  $Z \sim P$ . Let  $p_{\Gamma}$  be the density  $\Gamma^{-1}P$ . Then  $p_{\Gamma}(x) = \det(\Gamma) \nabla \log p(\Gamma x)$  and  $\nabla \log p_{\Gamma}(x) = \Gamma \nabla \log p(\Gamma x)$ , and for any  $\sigma \in \binom{[L]}{m}$ , the analog  $p_{\Gamma, \sigma}$  of  $p_{\sigma}$  satisfies  $p_{\Gamma, \sigma}(x) = \det(\Gamma) \nabla \log p_{\sigma}(\Gamma x)$  and  $\nabla \log p_{\Gamma, \sigma}(x) = \Gamma \nabla \log p_{\sigma}(\Gamma x)$ . By the same argument made in [10, Lem. 4], we have that  $\nabla \log p_{\Gamma}$  is Lipschitz and  $\nabla \log p_{\Gamma, \sigma}$  satisfies distant dissipativity. And since

$$\frac{\|\nabla \log p_{\Gamma, \sigma}(x)\|_2}{1 + \|x\|_2} = \frac{\|\Gamma \nabla \log p_{\sigma}(\Gamma x)\|_2}{1 + \|\Gamma x\|_2} \frac{1 + \|\Gamma x\|_2}{1 + \|x\|_2} \leq \|\Gamma\|_{\text{op}} (1 + \|\Gamma\|_{\text{op}}) \frac{\|\nabla \log p_{\sigma}(\Gamma x)\|_2}{1 + \|\Gamma x\|_2}$$

is uniformly bounded, we can apply the same argument discussed in [10, Lem. 4], i.e., make a global change of coordinates  $x \mapsto \Gamma^{-1}x$  and then invoke Theorem 6 for  $\Gamma^{-1}P$  and  $\Gamma^{-1}Q_n$  with a non-preconditioned kernel, thereby concluding the proof.

**Classical Stein set** Suppose  $\mathcal{G}_n = \mathcal{G}_{\|\cdot\|}$  satisfies (A.2). By the proof of Theorem 3, for  $\Gamma = I$  and any  $\beta \in (-1, 0)$ , there is a constant  $c_0 > 0$  such that the kernel Stein set  $\mathcal{G}_{k, \|\cdot\|_2} \subseteq c_0 \mathcal{G}_n$ . Hence  $\mathcal{SS}(Q_n, \mathcal{T}_P, \mathcal{G}_{k, \|\cdot\|_2}) \leq c_0 \mathcal{SS}(Q_n, \mathcal{T}_P, \mathcal{G}_n)$  for all  $n$  implying the result.

**Graph Stein set** Suppose  $\mathcal{G}_n$  satisfies (A.3). Then the result follows as  $\mathcal{G}_n$  contains the classical Stein set  $\mathcal{G}_{\|\cdot\|}$ .

## G Proof of Theorem 7: Wasserstein convergence of SVGD and SSVGd

### G.1 Additional notation

For each  $\epsilon > 0$  and collection of  $n$  points  $(x_i^n)_{i=1}^n$  with associated discrete measure  $\nu_n = \frac{1}{n} \sum_{i=1}^n \delta_{x_i^n}$ , we define the random one-step SSVGd mapping

$$T_{\nu_n, \epsilon, n}^m(x) = x + \epsilon \frac{1}{n} \sum_{j=1}^n \frac{L}{m} \nabla \log p_{\sigma_j}(x_j^n) k(x_j^n, x) + \nabla_{x_j^n} k(x_j^n, x)$$

for  $(\sigma_j)_{j=1}^n$  independent uniformly random size- $m$  subsets of  $[L]$ . We also let  $\Phi_{\epsilon, n}^m(\mu)$  denote the random distribution of  $T_{\nu_n, \epsilon, n}^m(X)$  when  $X \sim \mu$ .

### G.2 Proof of Theorem 7

We will prove each convergence claim by induction on  $r \geq 0$ .

**Inductive proof of  $W_1(Q_{n,r}, Q_{\infty,r}) \rightarrow 0$**  For our base case we have  $W_1(Q_{n,0}, Q_{\infty,0}) \rightarrow 0$  by assumption.

Now, fix any  $r \geq 0$  and assume  $W_1(Q_{n,r}, Q_{\infty,r}) \rightarrow 0$ , so that  $c_0(1 + \|\cdot\|_2)$  is uniformly  $Q_{n,r}$ -integrable and  $Q_{\infty,r}$ -integrable by [17, Proof of Cor. 1]. Therefore, there exists a constant  $C' > 0$  such that

$$\sup_{n \geq 1} 1 + \epsilon_r c_1(1 + Q_{n,r}(\|\cdot\|_2)) + \epsilon_r c_2(1 + Q_{\infty,r}(\|\cdot\|_2)) \leq C'.$$

Now, note that

$$W_1(Q_{n,r+1}, Q_{\infty,r+1}) = W_1(\Phi_{\epsilon_r}(Q_{n,r}), \Phi_{\epsilon_r}(Q_{\infty,r})).$$

To control this expression, we provide a lemma, proved in App. G.3, which establishes the pseudo-Lipschitzness of the one-step SVGD mapping  $\Phi_\epsilon$ .

**Lemma 12** (Wasserstein pseudo-Lipschitzness of SVGD). *Suppose that, for some  $c_1, c_2 > 0$ ,*

$$\begin{aligned} \sup_{z \in \mathbb{R}^d} \|\nabla_z(\nabla \log p(x)k(x, z) + \nabla_x k(x, z))\|_{\text{op}} &\leq c_1(1 + \|x\|_2) \quad \text{and} \\ \sup_{x \in \mathbb{R}^d} \|\nabla_x(\nabla \log p(x)k(x, z) + \nabla_x k(x, z))\|_{\text{op}} &\leq c_2(1 + \|z\|_2). \end{aligned}$$

Then, for any  $\epsilon > 0$  and probability measures  $\mu, \nu$ ,

$$W_1(\Phi_\epsilon(\mu), \Phi_\epsilon(\nu)) \leq W_1(\mu, \nu)(1 + \epsilon c_1(1 + \mu(\|\cdot\|_2)) + \epsilon c_2(1 + \nu(\|\cdot\|_2))).$$

Our pseudo-Lipschitz assumptions (7) and Lemma 12 imply

$$\begin{aligned} W_1(\Phi_{\epsilon_r}(Q_{n,r}), \Phi_{\epsilon_r}(Q_{\infty,r})) &\leq W_1(Q_{n,r}, Q_{\infty,r})(1 + \epsilon_r c_1(1 + Q_{n,r}(\|\cdot\|_2)) + \epsilon_r c_2(1 + Q_{\infty,r}(\|\cdot\|_2))) \\ &\leq C' W_1(Q_{n,r}, Q_{\infty,r}) \rightarrow 0, \end{aligned}$$

proving our first claim.

**Inductive proof of  $W_1(Q_{n,r}^m, Q_{n,r}) \rightarrow 0$**  For our base case we have,  $W_1(Q_{n,0}^m, Q_{n,0}) = 0$ .

Now fix any  $r \geq 0$ , let  $\mathcal{E}$  be the event on which  $W_1(Q_{n,r}^m, Q_{n,r}) \rightarrow 0$  as  $n \rightarrow \infty$ , and assume  $\mathbb{P}(\mathcal{E}) = 1$ . Since  $W_1(Q_{n,r}, Q_{\infty,r}) \rightarrow 0$ , on  $\mathcal{E}$  we find that  $W_1(Q_{n,r}^m, Q_{\infty,r}) \rightarrow 0$  and hence  $c_0(1 + \|\cdot\|_2)$  is uniformly  $Q_{n,r}^m$ -integrable and uniformly  $Q_{n,r}$ -integrable by [17, Proof of Cor. 1]. Therefore, on  $\mathcal{E}$ , there exists a constant  $C$  such that

$$\sup_{n \geq 1} 1 + \epsilon_r c_1(1 + Q_{n,r}^m(\|\cdot\|_2)) + \epsilon_r c_2(1 + Q_{n,r}(\|\cdot\|_2)) \leq C.$$

By the triangle inequality,

$$\begin{aligned} W_1(Q_{n,r+1}^m, Q_{n,r+1}) &= W_1(\Phi_{\epsilon_r, n}^m(Q_{n,r}^m), \Phi_{\epsilon_r}(Q_{n,r})) \\ &\leq W_1(\Phi_{\epsilon_r, n}^m(Q_{n,r}^m), \Phi_{\epsilon_r}(Q_{n,r}^m)) + W_1(\Phi_{\epsilon_r}(Q_{n,r}^m), \Phi_{\epsilon_r}(Q_{n,r})). \end{aligned}$$

On  $\mathcal{E}$ , our growth assumptions (8), the uniformly  $Q_{n,r}^m$ -integrability of  $c_0(1 + \|\cdot\|_2)$ , and the following lemma, proved in App. G.4, establish that the Wasserstein distance  $W_1(\Phi_{\epsilon_r, n}^m(Q_{n,r}^m), \Phi_{\epsilon_r}(Q_{n,r}^m))$  between one step of SSVG and one step of SVGD from a common starting point converges to 0 almost surely as  $n$  grows.

**Lemma 13** (One-step convergence of SSVG to SVGD). *Fix any triangular array of points  $(x_i^m)_{i \in [n], n \geq 1}$  in  $\mathbb{R}^d$ , and define the discrete probability measures  $\nu_n = \frac{1}{n} \sum_{i=1}^n \delta_{x_i^m}$ . Suppose  $\nabla \log p_\sigma(\cdot)k(\cdot, z)$  is continuous for each  $z \in \mathbb{R}^d$  and  $\sigma \in \binom{[L]}{m}$  and let*

$$\begin{aligned} f_0(x) &\triangleq \sup_{z \in \mathbb{R}^d, \sigma \in \binom{[L]}{m}} \|\nabla \log p_\sigma(x)\|_\infty |k(x, z)|, \\ f_1(x) &\triangleq \sup_{z \in \mathbb{R}^d, \sigma \in \binom{[L]}{m}} \|\nabla_x(\nabla \log p_\sigma(x)k(x, z))\|_{\text{op}}. \end{aligned}$$

If  $f_0$  is  $\nu_n$ -uniformly integrable and  $f_0, f_1$  are bounded on each compact set, then, for any  $\epsilon > 0$ ,  $W_1(\Phi_{\epsilon, n}^m(\nu_n), \Phi_\epsilon(\nu_n)) \xrightarrow{a.s.} 0$  as  $n \rightarrow \infty$ .

In addition, on  $\mathcal{E}$ , our pseudo-Lipschitz assumptions (7) and Lemma 12 imply

$$\begin{aligned} W_1(\Phi_{\epsilon_r}(Q_{n,r}^m), \Phi_{\epsilon_r}(Q_{n,r})) &\leq W_1(Q_{n,r}^m, Q_{n,r})(1 + \epsilon_r c_1(1 + Q_{n,r}^m(\|\cdot\|_2)) + \epsilon_r c_2(1 + Q_{n,r}(\|\cdot\|_2))) \\ &\leq C W_1(Q_{n,r}^m, Q_{n,r}) \rightarrow 0. \end{aligned}$$

Hence, on  $\mathcal{E}$ ,  $W_1(Q_{n,r+1}^m, Q_{n,r+1}) \xrightarrow{a.s.} 0$ , proving our second claim.

### G.3 Proof of Lemma 12: Wasserstein pseudo-Lipschitzness of SVGD

Assume that  $\mu$  and  $\nu$  have integrable means (or else the advertised claim is vacuous), and select  $(X', Z')$  to be an optimal 1-Wasserstein coupling of  $(\mu, \nu)$ . The triangle inequality, Jensen's inequality, and our pseudo-Lipschitzness assumptions imply that

$$\begin{aligned}
& \|T_{\mu,\epsilon}(x) - T_{\nu,\epsilon}(z)\|_2 \\
& \leq \|x - z\|_2 \\
& + \epsilon \|\mathbb{E}[\nabla \log p(X')k(X', x) + \nabla_{x'}k(X', x) - (\nabla \log p(X')k(X', z) + \nabla k(X', z))]\|_2 \\
& + \epsilon \|\mathbb{E}[\nabla \log p(X')k(X', z) + \nabla_{x'}k(X', z) - (\nabla \log p(Z')k(Z', z) + \nabla_{z'}k(Z', z))]\|_2 \\
& \leq \|x - z\|_2(1 + \epsilon c_1(1 + \mathbb{E}\|X'\|_2)) + \epsilon c_2 \mathbb{E}\|X' - Z'\|_2(1 + \|z\|_2) \\
& = \|x - z\|_2(1 + \epsilon c_1(1 + \mu(\|\cdot\|_2))) + \epsilon c_2 W_1(\mu, \nu)(1 + \|z\|_2).
\end{aligned}$$

Since  $T_{\mu,\epsilon}(X') \sim \Phi_\epsilon(\mu)$  and  $T_{\nu,\epsilon}(Z') \sim \Phi_\epsilon(\nu)$ , we conclude that

$$\begin{aligned}
W_1(\Phi_\epsilon(\mu), \Phi_\epsilon(\nu)) & \leq \mathbb{E}\|T_{\mu,\epsilon}(X') - T_{\nu,\epsilon}(Z')\|_2 \\
& \leq \mathbb{E}\|X' - Z'\|_2(1 + \epsilon c_1(1 + \mu(\|\cdot\|_2))) + \epsilon c_2 W_1(\mu, \nu)(1 + \mathbb{E}\|Z'\|_2) \\
& = W_1(\mu, \nu)(1 + \epsilon c_1(1 + \mu(\|\cdot\|_2))) + \epsilon c_2(1 + \nu(\|\cdot\|_2)).
\end{aligned}$$

### G.4 Proof of Lemma 13: One-step convergence of SSVGD to SVGD

Note that the random one-step SSVGD mapping takes the form

$$T_{\nu_n, \epsilon, n}^m(x) = x + \epsilon \nu_n(\nabla_{x_j^n} k(\cdot, x)) + \epsilon \binom{L}{m}^{-1} \sum_{\sigma \in \binom{[L]}{m}} \nu_{n\sigma}(\nabla \log p_\sigma(\cdot)k(\cdot, x))$$

for  $\nu_{n\sigma} = \binom{L}{m} \frac{L}{m} \frac{1}{n} \sum_{j=1}^n B_{j\sigma} \delta_{x_j^n}$  and  $B_{j\sigma} = \mathbb{I}[\sigma = \sigma_j]$ . Moreover, by Kantorovich-Rubinstein duality, we may write the 1-Wasserstein distance as

$$\begin{aligned}
& W_1(\Phi_{\epsilon, n}^m(\nu_n), \Phi_\epsilon(\nu_n)) \\
& = \sup_{f: M_1(f) \leq 1} \Phi_{\epsilon, n}^m(\nu_n)(f) - \Phi_\epsilon(\nu_n)(f) \\
& = \sup_{f: M_1(f) \leq 1} \frac{1}{n} \sum_{i=1}^n f(T_{\nu_n, \epsilon, n}^m(x_i^n)) - f(T_{\nu_n, \epsilon}(x_i^n)) \\
& \leq \frac{1}{n} \sum_{i=1}^n \|T_{\nu_n, \epsilon, n}^m(x_i^n) - T_{\nu_n, \epsilon}(x_i^n)\|_2 \\
& = \binom{L}{m}^{-1} \frac{\epsilon}{n} \sum_{i=1}^n \|\sum_{\sigma} \frac{L}{m} \nu_n(\nabla \log p_\sigma(\cdot)k(\cdot, x_i^n)) - \nu_{n\sigma}(\nabla \log p_\sigma(\cdot)k(\cdot, x_i^n))\|_2 \\
& \leq \binom{L}{m}^{-1} \sum_{\sigma} \frac{\epsilon \sqrt{d}}{n} \sum_{i=1}^n \|\frac{L}{m} \nu_n(\nabla \log p_\sigma(\cdot)k(\cdot, x_i^n)) - \nu_{n\sigma}(\nabla \log p_\sigma(\cdot)k(\cdot, x_i^n))\|_\infty \\
& \leq \epsilon \sqrt{d} \binom{L}{m}^{-1} \sum_{\sigma} \sup_{h \in \mathcal{H}_f} |\nu_{n\sigma}(h) - \frac{L}{m} \nu_n(h)|. \tag{15}
\end{aligned}$$

where we have used the triangle inequality and norm relation  $\|\cdot\|_2 \leq \sqrt{d}\|\cdot\|_\infty$  in the penultimate display and  $\mathcal{H}_f$  is defined in the statement of Lemma 8.

For each  $\sigma \in \binom{[L]}{m}$ , since  $|f_0|$  is uniformly  $\nu_n$ -integrable, and  $\nu_{n\sigma}(|f_0|I_K) \leq \binom{L}{m} \frac{L}{m} \nu_n(|f_0|I_K)$  for every compact set  $K$ , we find that  $|f_0|$  is uniformly  $\nu_{n\sigma}$ -integrable for each  $\sigma$ . Letting  $I_{B_R}(x) = \mathbb{I}[\|x\|_2 \leq R]$ , for each  $\sigma$ , since  $\nu_{n\sigma}(hI_{B_R}) - \frac{L}{m} \nu_n(hI_{B_R}) \xrightarrow{a.s.} 0$  for any  $R > 0$  and any bounded  $h$  by Lemma 10, we have  $\sup_{h \in \mathcal{H}_f} |\nu_{n\sigma}(h) - \frac{L}{m} \nu_n(h)| \xrightarrow{a.s.} 0$  by Lemma 8. The result now follows from the bound (15).
